# Supplementary material for: A whole-course-repair system based on ROS/glucose stimuli-responsive EGCG release and tunable mechanical property for efficient treatment of chronic periodontitis in diabetic rats
Source: Royal Society of Chemistry journal article supplement (doi:10.1039/d3tb02898d), 2024-01-01
Supplement: d3tb02898d1.pdf [file d3tb02898d1.pdf]

## Supplementary material

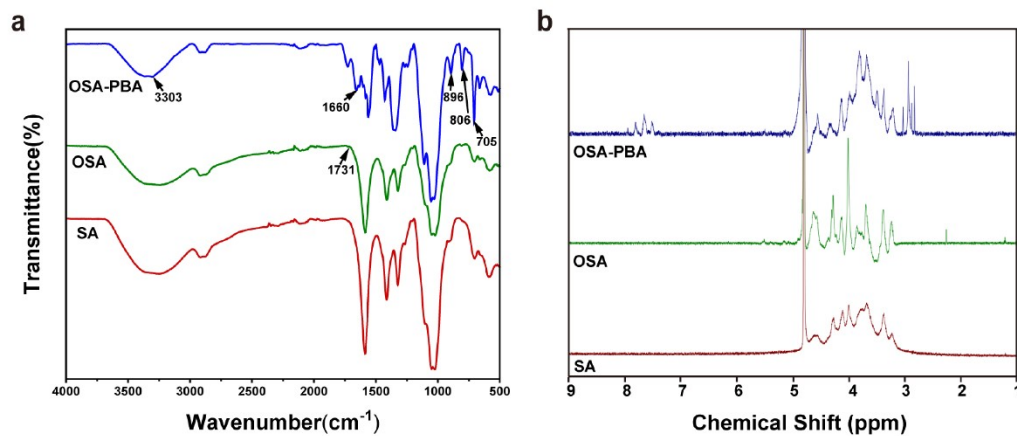

**Figure S1.** Design and chemical structure of SA, OSA and OSA-PBA. (a) The FTIR spectra of SA, OSA and OSA-PBA. (b) The <sup>1</sup>H NMR spectra of SA, OSA and OSA-PBA.

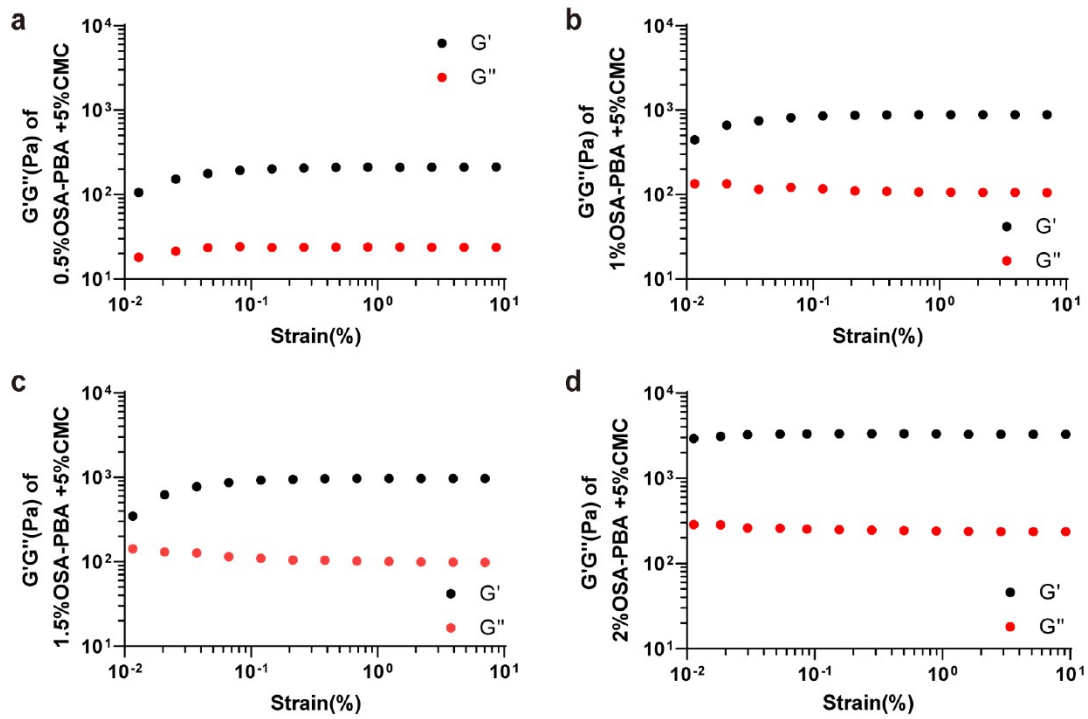

**Figure S2.** Variations of storage and loss moduli ( $G'$  and  $G''$ ) versus strain (0.01-10%) of the hydrogels formed with different concentration of OSA-PBA at 0.5% (a), 1% (b), 1.5% (c) and 2% (d).

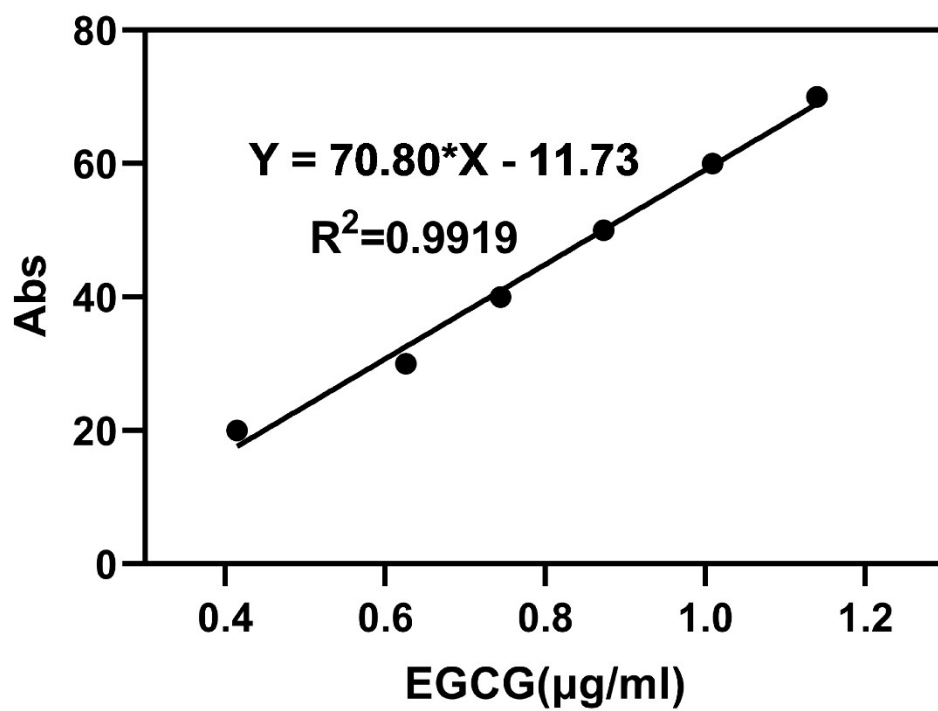

**Figure S3.** Standard curves of EGCG release *in vitro*.

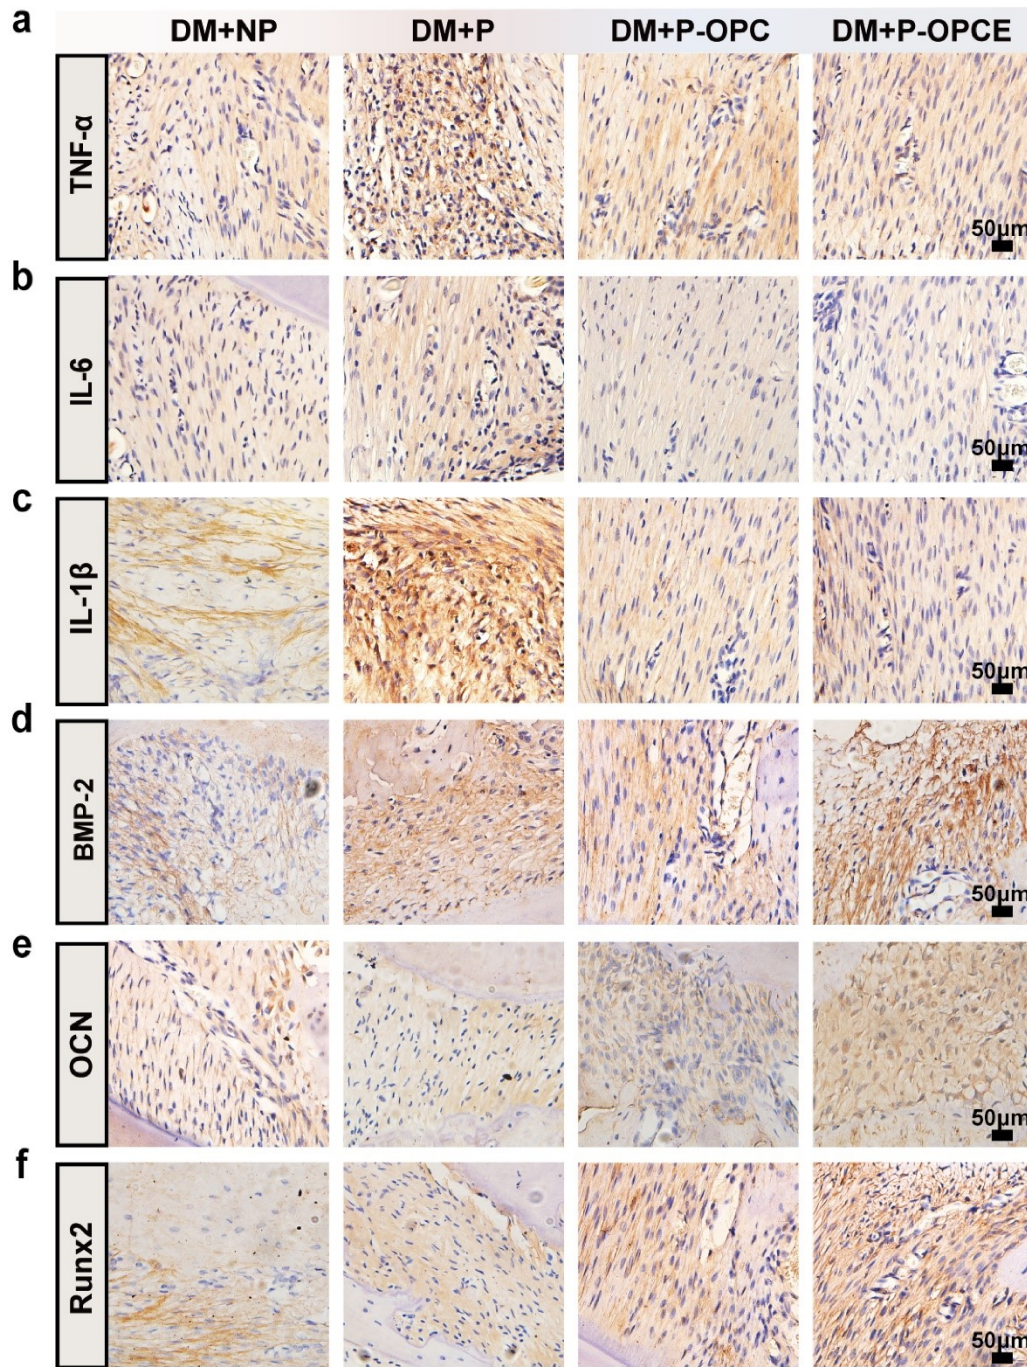

**Figure S4.** The immunohistochemical analysis of TNF- $\alpha$  (a), IL-6 (b), IL-1 $\beta$  (c), BMP-2 (d), OCN (e) and Runx2 (f) positive cells around maxillary second molars after treatment. Scale bar=50 $\mu$ m.

**Table S1.** Primer sequence of related genes

| <b>Gene</b>                    | <b>Primer</b> | <b>Sequence (5' to 3')</b> |
|--------------------------------|---------------|----------------------------|
| <b>GAPDH (mouse)</b>           | Forward       | TGAGGTGACCGCATCTTCTTG      |
| <b>GAPDH (mouse)</b>           | Reverse       | TGGTAACCAGGCGTCCGATA       |
| <b>GAPDH (rat)</b>             | Forward       | AGGTCGGTGTGAACGGATTG       |
| <b>GAPDH (rat)</b>             | Reverse       | GGGGTCGTTGATGGCAACA        |
| <b>IL-6</b>                    | Forward       | GAGGATACCACTCCCAACAGACC    |
| <b>IL-6</b>                    | Reverse       | AAGTGCATCATCGTTGTTCATACA   |
| <b>TNF-<math>\alpha</math></b> | Forward       | AGGGTCTGGGCCATAGAACT       |
| <b>TNF-<math>\alpha</math></b> | Reverse       | CCACCACGCTCTTCTGTCTAC      |
| <b>iNOS</b>                    | Forward       | GTTCTCAGCCCAACAATAACAAGA   |
| <b>iNOS</b>                    | Reverse       | GTGGACGGGTCGATGTCAC        |
| <b>IL-1<math>\beta</math></b>  | Forward       | TGGTGTGTGACGTTCCC          |
| <b>IL-1<math>\beta</math></b>  | Reverse       | TGTCCATTGAGGTGGAGAG        |
| <b>CD86</b>                    | Forward       | CTTACGGAAGCACCCACGAT       |
| <b>CD86</b>                    | Reverse       | CGGCAGATATGCAGTCCCAT       |
| <b>CD206</b>                   | Forward       | AGACGAAATCCCTGCTACTG       |
| <b>CD206</b>                   | Reverse       | CACCCATTCGAAGGCATTC        |
| <b>Arg</b>                     | Forward       | GGAATCTGCATGGGCAACCTGTGT   |
| <b>Arg</b>                     | Reverse       | AGGGTCTACGTCTCGCAAGCCA     |
| <b>ALP</b>                     | Forward       | CGTCTCCATGGTGGATTATGCT     |
| <b>ALP</b>                     | Reverse       | CGTCTCCATGGTGGATTATGCT     |
| <b>BMP2</b>                    | Forward       | ACCGTGCTCAGCTTCCATCAC      |
| <b>BMP2</b>                    | Reverse       | CTATTTCCCAAAGCTTCCTGCATTT  |
| <b>Runx2</b>                   | Forward       | CAGTTCCCAAGCATTTCATCC      |
| <b>Runx2</b>                   | Reverse       | TCAATATGGTCGCCAAA CAG      |
| <b>TRAP</b>                    | Forward       | CAGCAGCCAAGGAGGACTAC       |
| <b>TRAP</b>                    | Reverse       | ACATAGCCCACACCGTTCTC       |
